# Supplementary material for: Phylogeny of Flavobacteria Group Isolated from Freshwater Using Multilocus Sequencing Analysis
Source: PubMed Central journal article supplement — Genomics Inform. 2013 Dec 31;11(4):272–6. doi: 10.5808/GI.2013.11.4.272 (PMC3897856; doi:10.5808/gi.2013.11.4.272), 2013-12-31
Supplement: gni-11-272-s001.pdf [file gni-11-272-s001.pdf]

## **SUPPLEMENTARY INFORMATION**

### **Phylogeny of Flavobacteria Group Isolated from Freshwater Using Multilocus Sequencing Analysis**

**Seyoung Mun<sup>1</sup>, Jungnam Lee<sup>1†</sup>, Siwon Lee<sup>2</sup>, Kyudong Han<sup>1</sup>, Tae-Young Ahn<sup>3\*</sup>**

<sup>1</sup>Department of Nanobiomedical Science & BK21 PLUS NBM Global Research Center for Regenerative Medicine, Dankook University, Cheonan 330-714, Korea, <sup>2</sup>Plant Quarantine Technology Center, Animal and Plant Quarantine Agency, Suwon 443-440, Korea, <sup>3</sup>Department of Microbiology, Dankook University, Cheonan 330-714, Korea

**Supplementary Table 1.** Information of nucleotide sequence accession numbers

|                                             | <i>tuf</i> | <i>murG</i> | <i>gyrB</i> | <i>glyA</i> | <i>dnaK</i> | <i>atpA</i> |
|---------------------------------------------|------------|-------------|-------------|-------------|-------------|-------------|
| <i>Flavobacterium aquatile</i><br>JCM 20475 | JX256829   | JX256836    | JX256843    | JX256850    | JX256857    | JX256864    |
| <i>F. koreense</i> ARSA-15                  | JX256830   | JX256837    | JX256844    | JX256851    | JX256858    | JX256865    |
| <i>F. koreense</i> ARSA-19                  | JX256831   | JX256838    | JX256845    | JX256852    | JX256859    | JX256866    |
| <i>F. koreense</i> ARSA-42                  | JX256832   | JX256839    | JX256846    | JX256853    | JX256860    | JX256867    |
| <i>F. chungnamense</i> ARSA-103             | JX256833   | JX256840    | JX256847    | JX256854    | JX256861    | JX256868    |
| <i>F. chungnamense</i> ARSA-108             | JX256834   | JX256841    | JX256848    | JX256855    | JX256862    | JX256869    |
| <i>F. frigidimaris</i> JCM 12218            | JX256835   | JX256842    | JX256849    | JX256856    | JX256863    | JX256870    |
